# Supplementary material for: First-in-Human Safety, Tolerability, and Pharmacokinetics of Single-Dose Kukoamine B Mesylate in Healthy Subjects: A Randomized, Double-Blind, Placebo-Controlled Phase I Study
Source: Springer Nature journal article supplement (doi:10.1007/s40121-024-00921-6), 2024-01-30
Supplement: MOESM1 [file 26677598]

## *Supplementary materials*

**First-in-human safety, tolerability and pharmacokinetics of single-dose kukoamine B mesylate in healthy subjects: A randomized, double-blind, placebo-controlled phase I study**

Hongzhong Liu<sup>1\*</sup>, Qian Zhao<sup>1\*</sup>, Yuping Yuan<sup>1</sup>, Zhenlei Wang<sup>1</sup>, Teng Wang<sup>1</sup>, Wei Tian<sup>1</sup>, Wen Zhong<sup>1</sup>, Ji Jiang<sup>1</sup>, Shuai Chen<sup>2</sup>, Kai Kong<sup>2</sup>, Chunyan Jin<sup>2</sup>, Pei Hu<sup>1</sup>

<sup>1</sup>Clinical Pharmacology Research Center, Peking Union Medical College Hospital, Chinese Academy of Medical Sciences & Peking Union Medical College, State Key Laboratory of Complex Severe and Rare Diseases, NMPA Key Laboratory for Clinical Research and Evaluation of Drug, Beijing Key Laboratory of Clinical PK and PD Investigation for Innovative Drugs, Beijing 100730, China.

<sup>2</sup>Clinical Research Center for Innovative Drugs, Tianjin Chasesun Pharmaceutical Co., Ltd, Tianjin 301700, China

\*These authors contributed equally to this work

Corresponding author:

Pei Hu,

Professor of Clinical Pharmacology Research Center, Peking Union Medical College

Hospital, Chinese Academy of Medical Sciences & Peking Union Medical College, No.

1 Shuaifuyuan, Dongcheng District, Beijing, China 100730

Tel/Fax: +86-10-69154637/+86-10-69154637

E-mail: [hubeipunch@163.com](mailto:hubeipunch@163.com)

**Supplementary Table S1.** Baseline characteristics of the participants

| Characteristics                  | 0.005 mg/kg<br>(n=4) | 0.02 mg/kg<br>(n=6) | 0.04 mg/kg<br>(n=6) | 0.08 mg/kg<br>(n=6) | 0.12 mg/kg<br>(n=6) | 0.24 mg/kg<br>(n=6) | 0.48 mg/kg<br>(n=6) | Placebo<br>(n=12) |
|----------------------------------|----------------------|---------------------|---------------------|---------------------|---------------------|---------------------|---------------------|-------------------|
| Age, years, mean±SD              | 29.0±8.37            | 24.7±3.39           | 29.0±4.86           | 31.2±4.31           | 35.0±6.13           | 32.5±5.24           | 29.0±9.55           | 32.7±5.66         |
| Male, n (%)                      | 2 (50.0)             | 3 (50.0)            | 3 (50.0)            | 4 (66.7)            | 2 (33.3)            | 4 (66.7)            | 3 (50.0)            | 9 (75.0)          |
| Weight, kg, mean±SD              | 62.5±3.17            | 61.1±7.87           | 71.2±5.92           | 65.5±8.16           | 65.0±9.22           | 70.0±12.6           | 68.6±8.70           | 69.2±5.43         |
| Height, cm, mean±SD              | 164.5±4.8            | 167.0±10.0          | 168.2±9.1           | 164.3±5.5           | 161.7±7.0           | 168.5±12.0          | 167.0±9.3           | 168.5±8.4         |
| BMI, kg/m <sup>2</sup> , mean±SD | 23.1±1.86            | 21.8±0.96           | 25.2±1.11           | 24.2±1.68           | 24.7±1.57           | 24.6±1.99           | 24.6±2.42           | 24.4±1.57         |
| Han nationality, n (%)           | 3 (75.0)             | 6 (100.0)           | 6 (100.0)           | 6 (100.0)           | 5 (83.3)            | 5 (83.3)            | 6 (100.0)           | 11 (91.7)         |

Abbreviations: BMI: body mass index; SD: standard deviation

**Supplementary Table S2.** Whole blood pharmacokinetic parameters in the 0.24- and 0.48-mg/kg KB

dose groups

|                                | <b>0.02 mg/kg (n=6)</b> | <b>0.04 mg/kg (n=6)</b> |
|--------------------------------|-------------------------|-------------------------|
| AUC <sub>0-25h</sub> , h*ng/mL | 675.67 ±118.01          | 1360.79 ±336.80         |
| AUC <sub>inf</sub> , h*ng/mL   | 675.32 ±117.58          | 1361.25 ±338.19         |
| AUC <sub>last</sub> , h*ng/mL  | 643.55 ±109.22          | 1325.35 ±329.06         |
| CL, L/h                        | 18.16 ±1.78             | 18.85 ±7.22             |
| C <sub>max</sub> , ng/mL       | 401 ±46.8               | 750 ±141                |
| Ke, l/h                        | 0.45 ±0.09              | 0.39 ±0.05              |
| MRT, h                         | 1.19 ±0.18              | 1.41 ±0.29              |
| T <sub>max</sub> , h           | 1.00 (1.00-1.00)        | 1.00 (0.67-1.00)        |
| Vd, L                          | 41.17 ±6.22             | 47.92 ±17.04            |
| T <sub>1/2</sub> , h           | 1.59 ±0.29              | 1.78 ±0.19              |

**Notes:** All data were described as “mean ± standard deviation,” except T<sub>max</sub> was described as “median (range)”.

**Abbreviations:** AUC: area under the curve; CL: clearance; C<sub>max</sub>: maximal concentration; ke: elimination rate constant; MRT: mean residence time; T<sub>max</sub>: time to peak drug concentration; T<sub>1/2</sub>: half-life; Vd: distribution volume

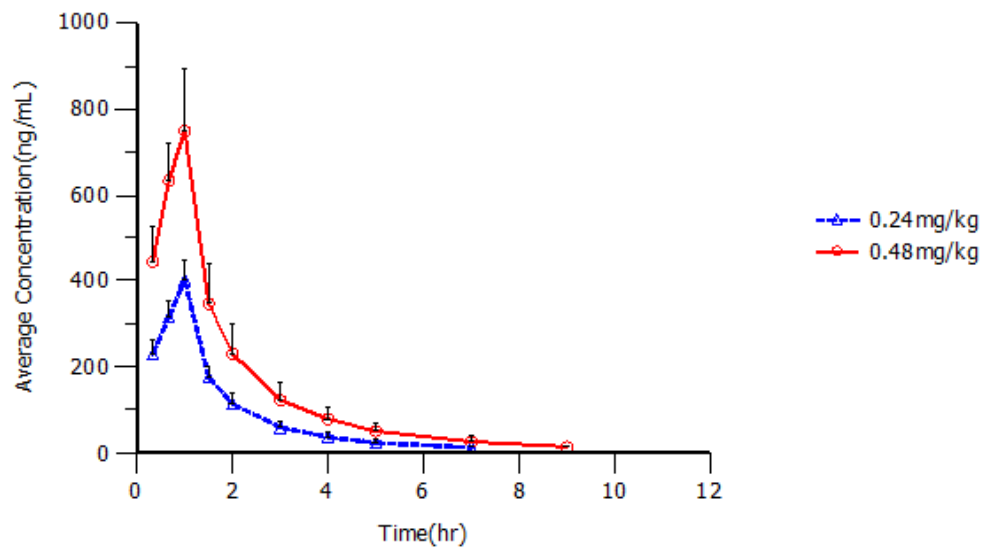

**Supplementary Figure S1.** Mean whole blood concentration-time curves (semi-log) in the 0.24 and 0.48 mg/kg KB dose groups

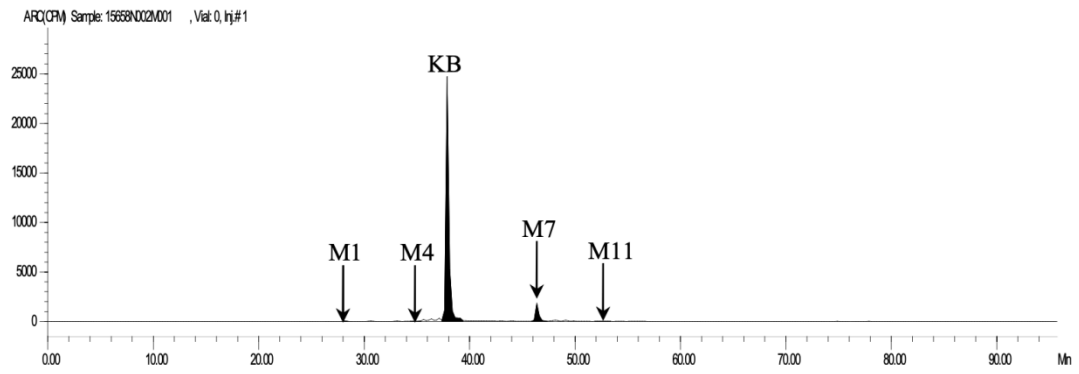

**Supplementary Figure S2.** Liquid chromatography of KB and metabolites in urine samples from participants received 0.12, 0.24 and 0.48 mg/kg KB
